# Supplementary material
Source: PubMed Central journal article supplement (PMC5123824)
Supplement: NIHMS823268-supplement-8.pdf [file NIHMS823268-supplement-8.pdf]

**SUPPLEMENTAL INFORMATION**

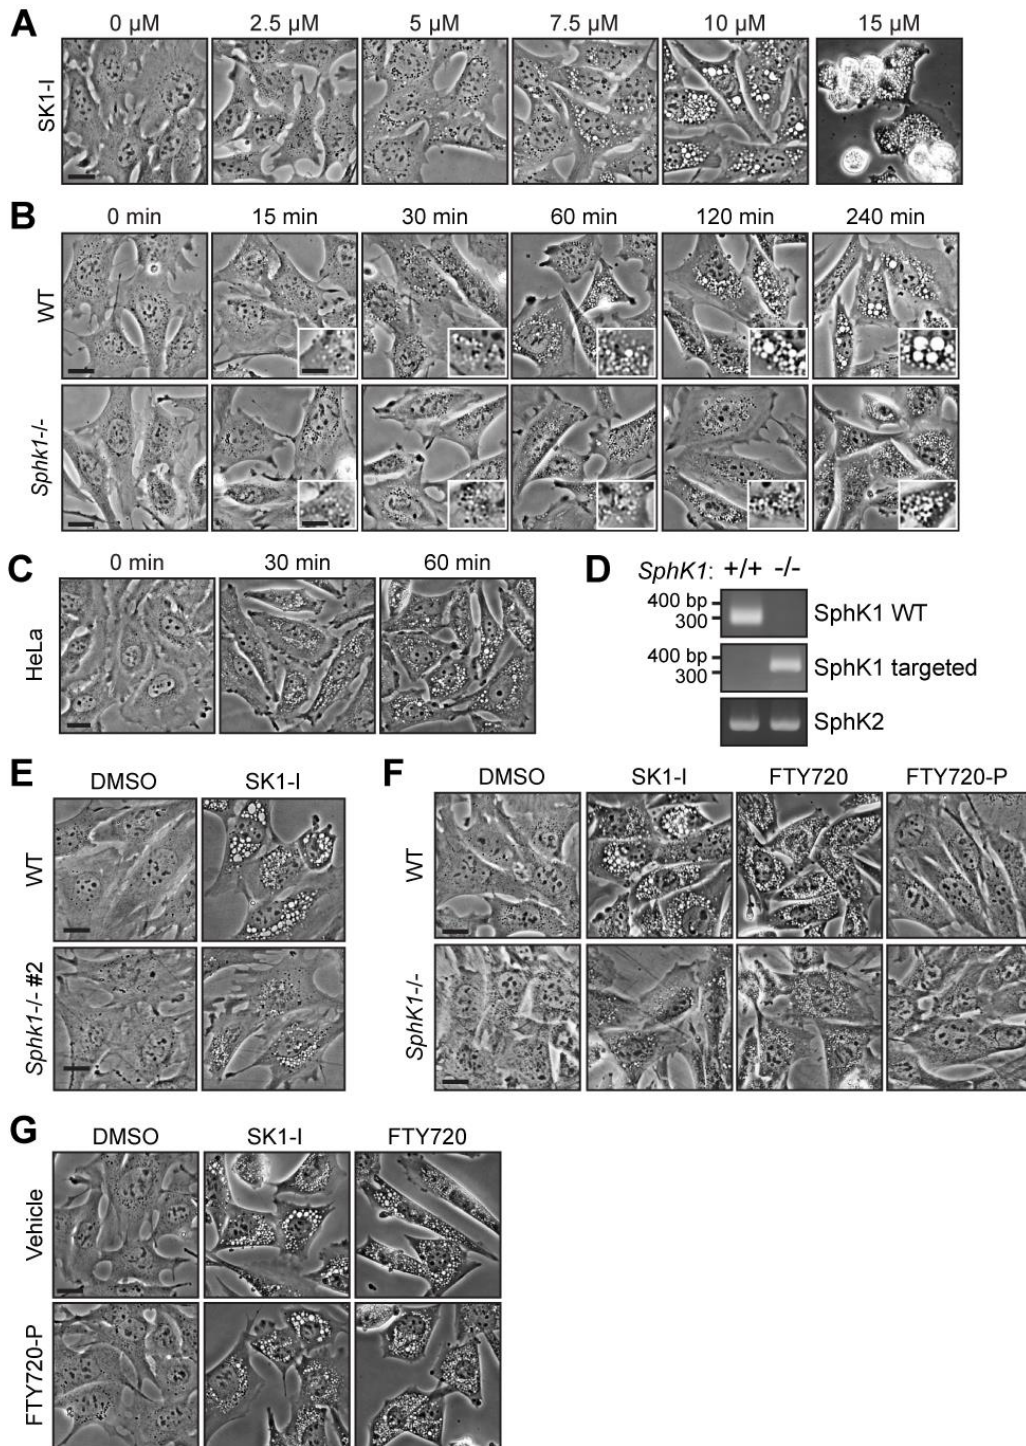

**Figure S1, Related to Figure 1.** (A) Phase contrast images of WT MEFs subjected to a dose-response of SK1-I for 4 h. (B) Phase contrast images of WT or *SphK1*<sup>-/-</sup> MEFs treated with 10  $\mu$ M SK1-I for the indicated durations. (C) Phase contrast images of HeLa cells treated with 10  $\mu$ M SK1-I for the indicated durations. (D) PCR genotyping of established WT and *SphK1*<sup>-/-</sup> MEFs. (E) Phase contrast images of WT MEFs or an additional *SphK1*<sup>-/-</sup> clone (*SphK1*<sup>-/-</sup> #2) treated with 10  $\mu$ M SK1-I for 2 h. (F) Phase contrast images of WT or *SphK1*<sup>-/-</sup> MEFs treated with 10  $\mu$ M SK1-I, FTY720 or FTY720-phosphate (FTY720-P) for 4 h. (G) Phase contrast images of WT MEFs pre-treated with 100 nM FTY720-P for 30 min prior to the addition of 10  $\mu$ M SK1-I or FTY720 for an additional 4 h. Scale bars represent: 20  $\mu$ m; 10  $\mu$ m in enlarged panels of (B).

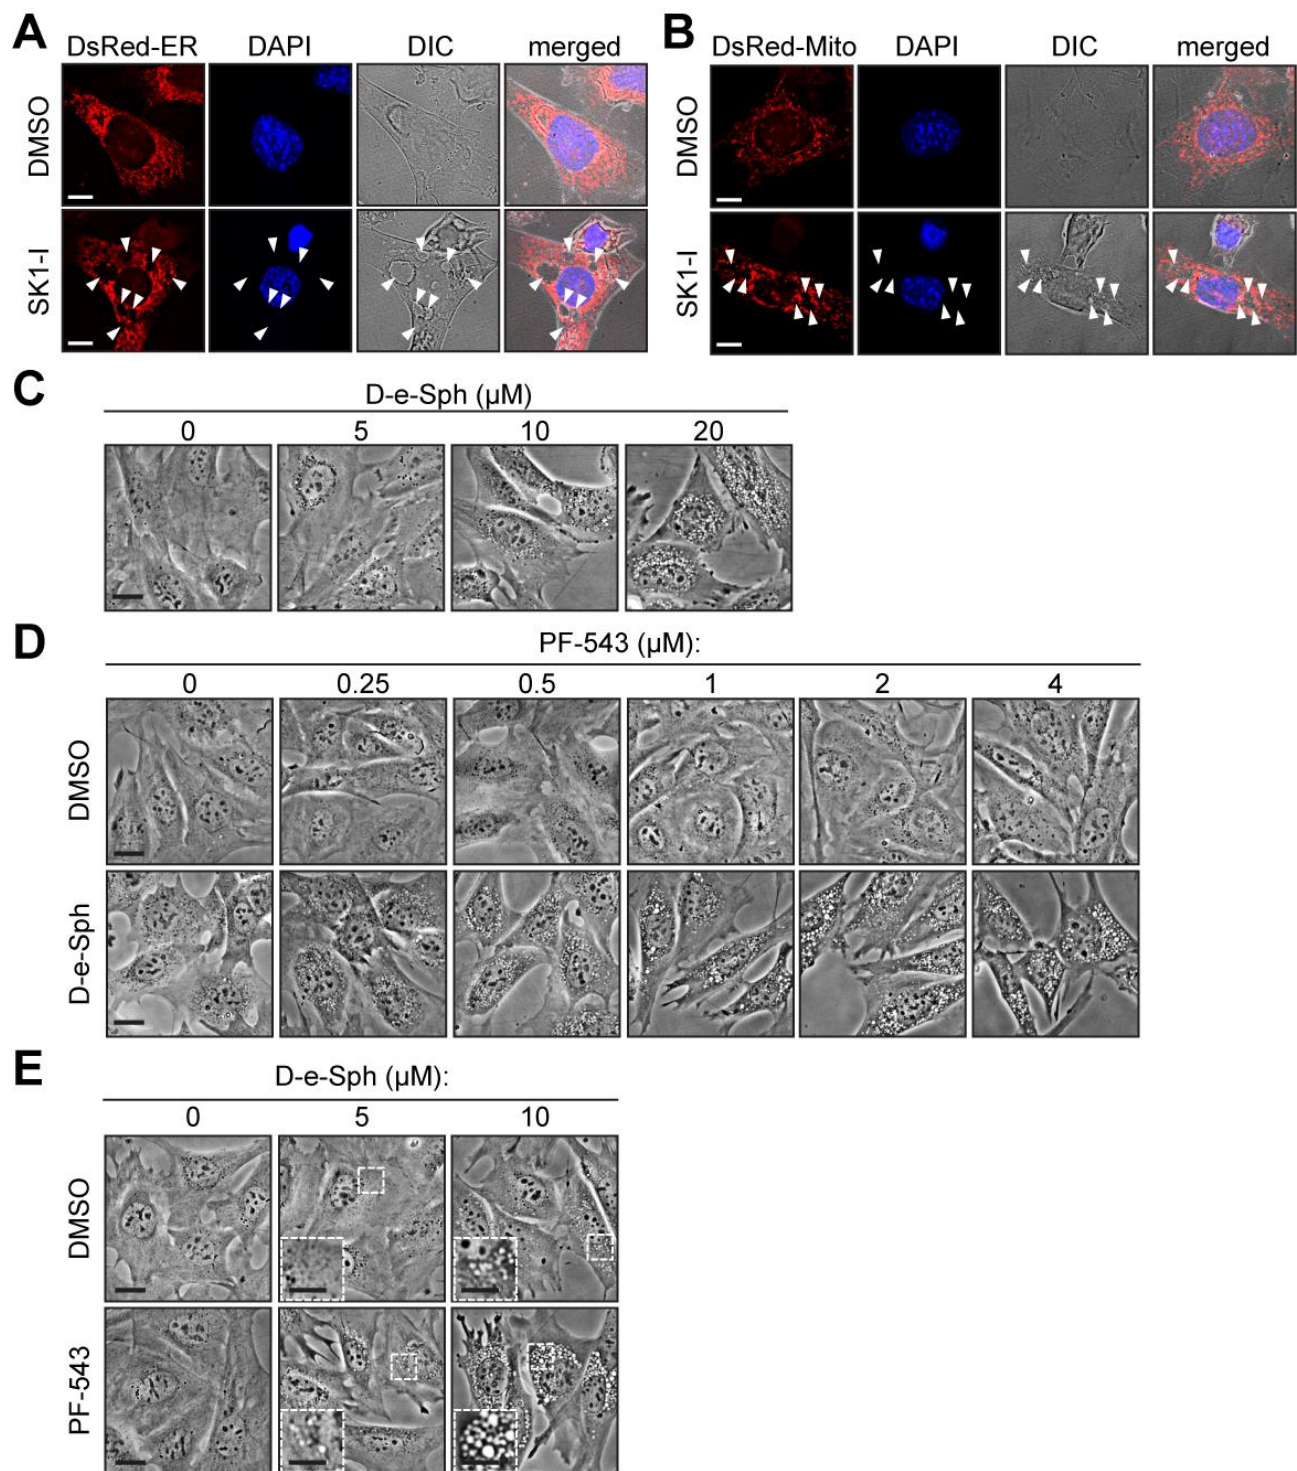

**Figure S2, Related to Figures 1 & 2.** (A-B), Fluorescence images of WT MEFs stably expressing (A) DsRed-ER or (B) DsRed-Mito and treated with 10  $\mu\text{M}$  SK1-I for 6 h followed by fixation and nuclei staining with DAPI. Arrowheads indicate vacuoles. (C) Phase contrast images of WT MEFs subjected to a dose-response of Sph for 4 h. (D) Phase contrast images of WT MEFs pre-treated with various concentrations of PF-543 for 30 min prior to 10  $\mu\text{M}$  Sph for an additional 2 h. (E) Phase contrast images of WT MEFs pre-treated with 2  $\mu\text{M}$  PF-543 for 30 min prior to the addition of 5  $\mu\text{M}$  or 10  $\mu\text{M}$  Sph for 2 h. Scale bars represent: 10  $\mu\text{m}$  in (A), (B), & enlarged panels of (E); 20  $\mu\text{m}$  in (C)-(E).

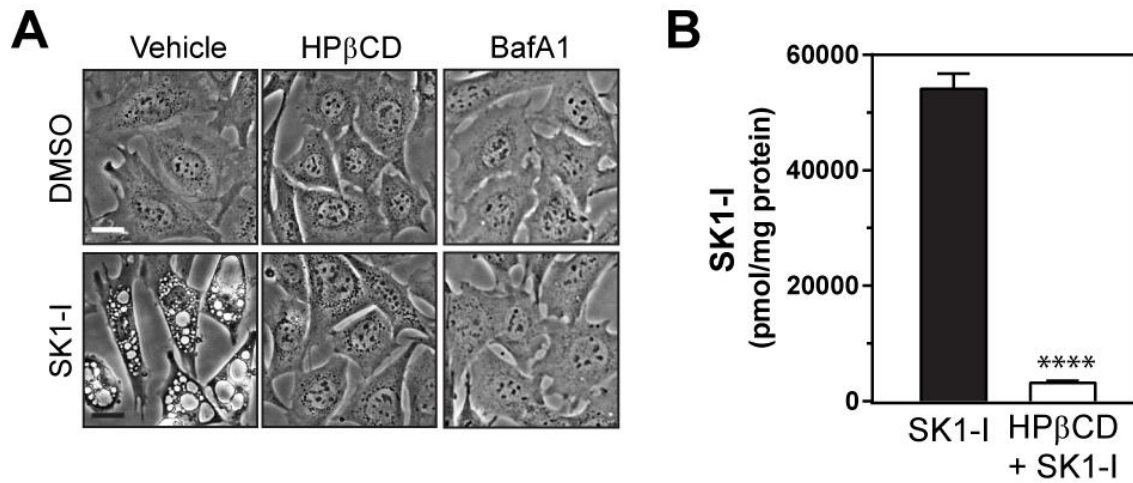

**Figure S3, Related to Figure 3.** (A), Phase contrast images of WT MEFs pre-treated with 2% HP $\beta$ CD or 100 nM bafilomycin A1 (BafA1) for 20 min prior to DMSO or 10  $\mu$ M SK1-I treatment for an additional 1 h. Scale bars represent 20  $\mu$ m. (B), LC-MS/MS quantification of SK1-I uptake using total cell lysates from WT MEFs pre-treated with vehicle or 2% HP $\beta$ CD for 20 min followed by 10  $\mu$ M SK1-I for an additional 4 h. Data represent the mean  $\pm$  SD of triplicate samples. Student's t-test. \*\*\*\*,  $p < 0.0001$ .



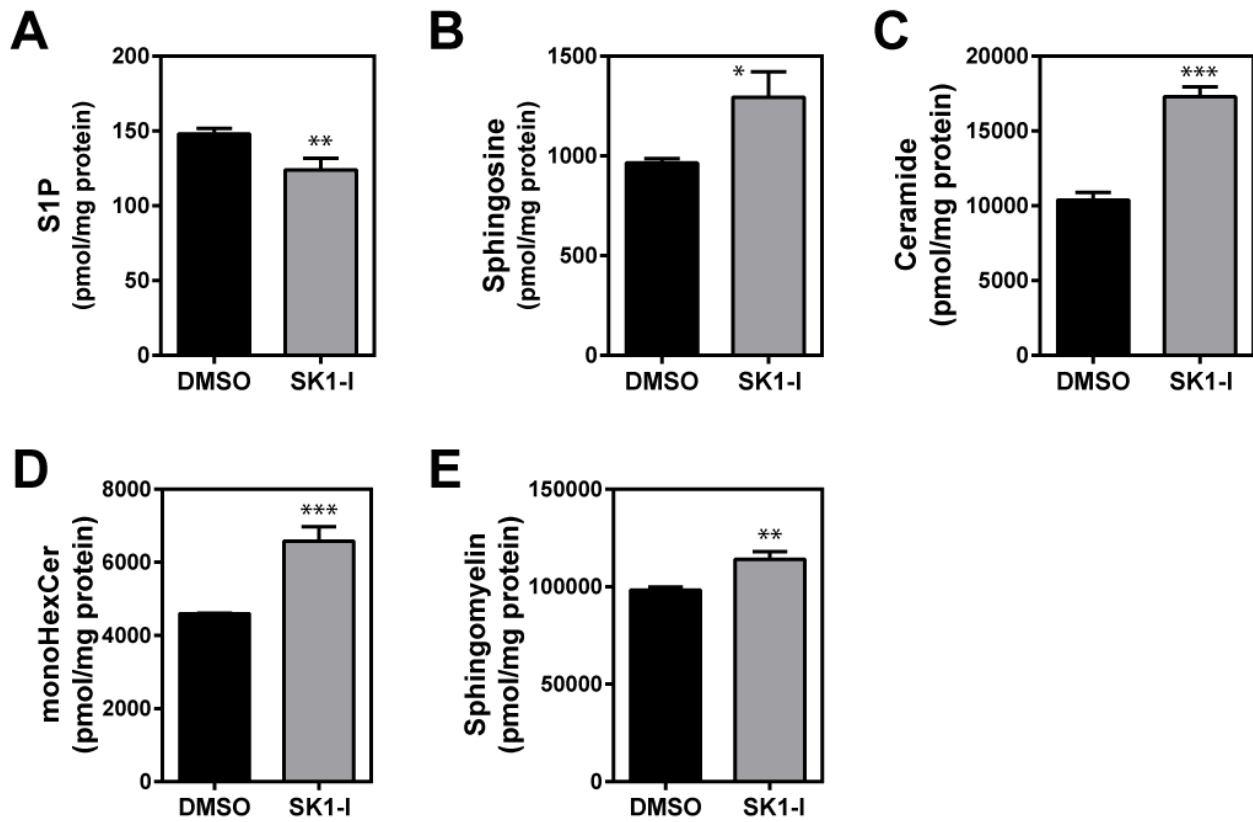

**Figure S4, Related to Figure 4.** LC-MS/MS quantification of cellular sphingolipids from total cell lysates after treatment of WT MEFs with DMSO or 10  $\mu$ M SK1-I for 4 h. Sphingolipids are presented as mean pmol per mg protein  $\pm$ SD of triplicate samples. (A), Sphingosine-1-phosphate. (B), Sphingosine. (C), Ceramide. (D), Monohexosylceramide. (E), Sphingomyelin. Student's t-test, \*\*\*,  $p < 0.001$ ; \*\*,  $p < 0.01$ ; \*,  $p < 0.05$ .

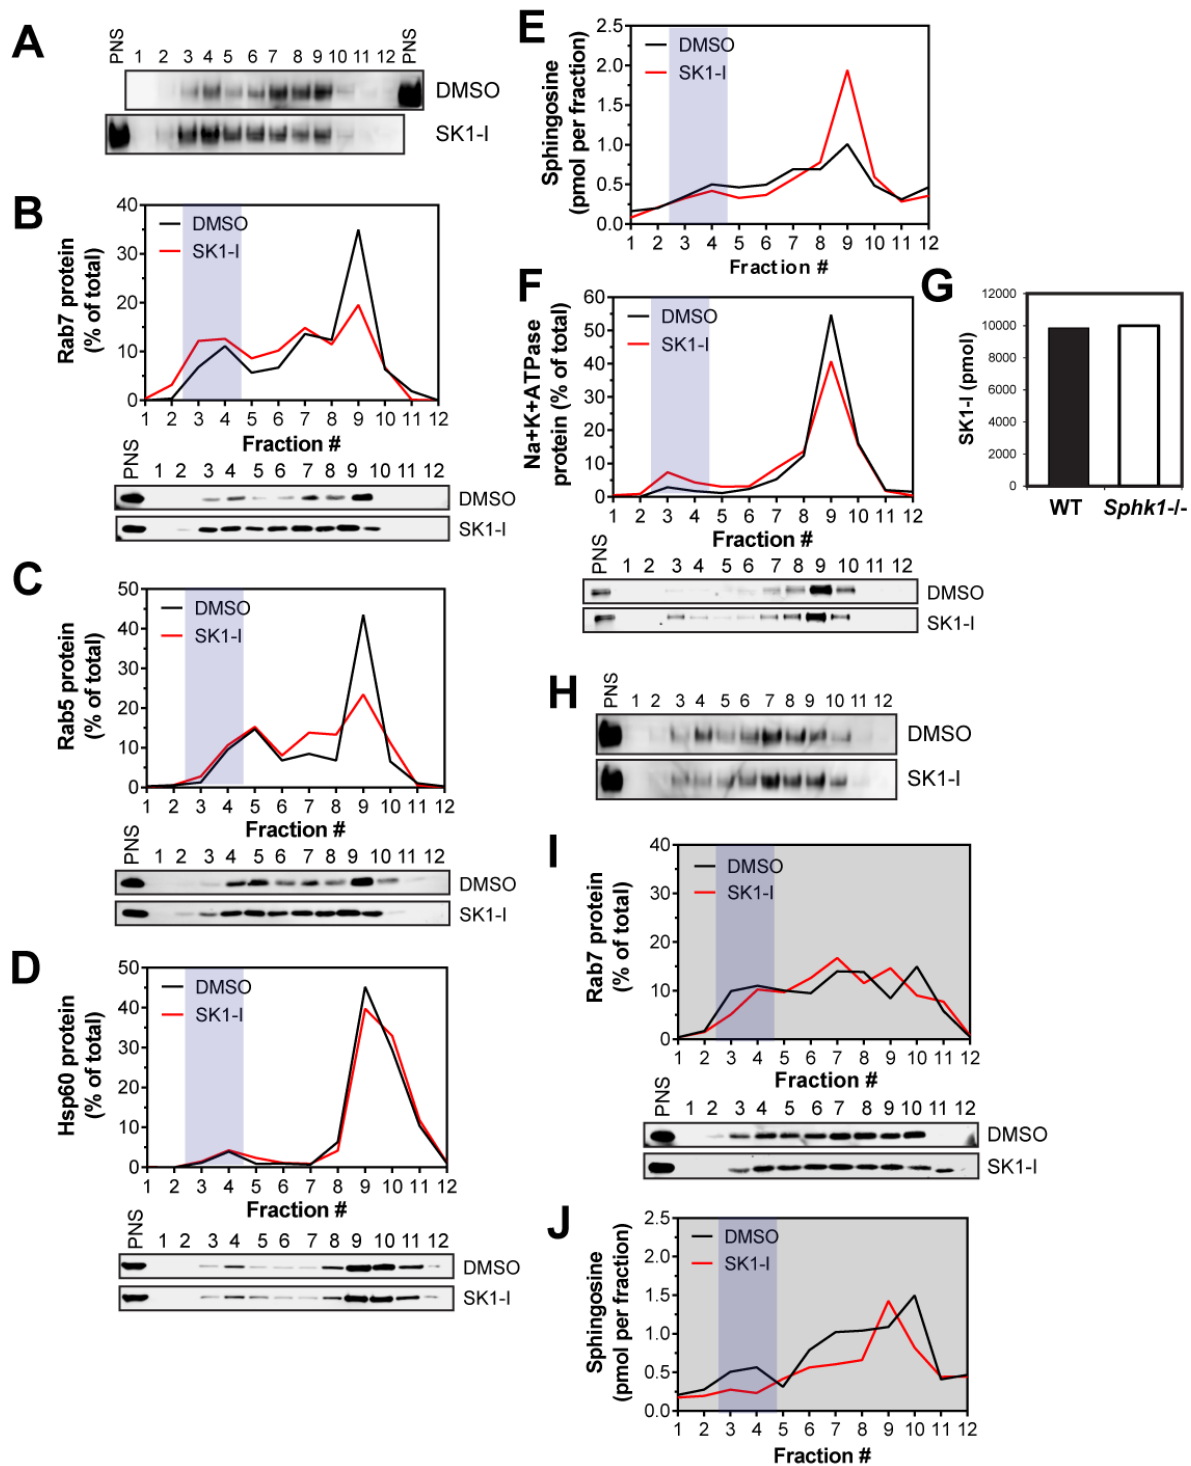

**Figure S5, Related to Figure 4.** WT (A-G) or *SphK1*<sup>-/-</sup> (G-J) MEFs were treated with DMSO or 10  $\mu$ M SK1-I for 4 h followed by subcellular fractionation as in Figure 4. Protein expression was quantified by western blot and is presented as percent enrichment in each fraction. Sphingolipids were quantified by LC-MS/MS and are presented as pmol lipid per fraction. (A) Immunoblot of Lamp1 in subcellular fractions of WT cells. (B-D and F), Immunoblot and quantification of (B) Rab7, (C) Rab5, (D) Hsp60, and (F) Na+K+ ATPase in subcellular fractions of WT cells. (E) Sphingosine quantification in subcellular fractions of WT cells. (G) Sum of SK1-I in subcellular fractions of WT or *SphK1*<sup>-/-</sup> MEFs treated for 4 h. (H) Immunoblot of Lamp1 in subcellular fractions of *SphK1*<sup>-/-</sup> cells. (I), Immunoblot and quantification of Rab7 in subcellular fractions of *SphK1*<sup>-/-</sup> cells. (J) Sphingosine quantification in subcellular fractions of *SphK1*<sup>-/-</sup> cells. PNS, post-nuclear supernatant.

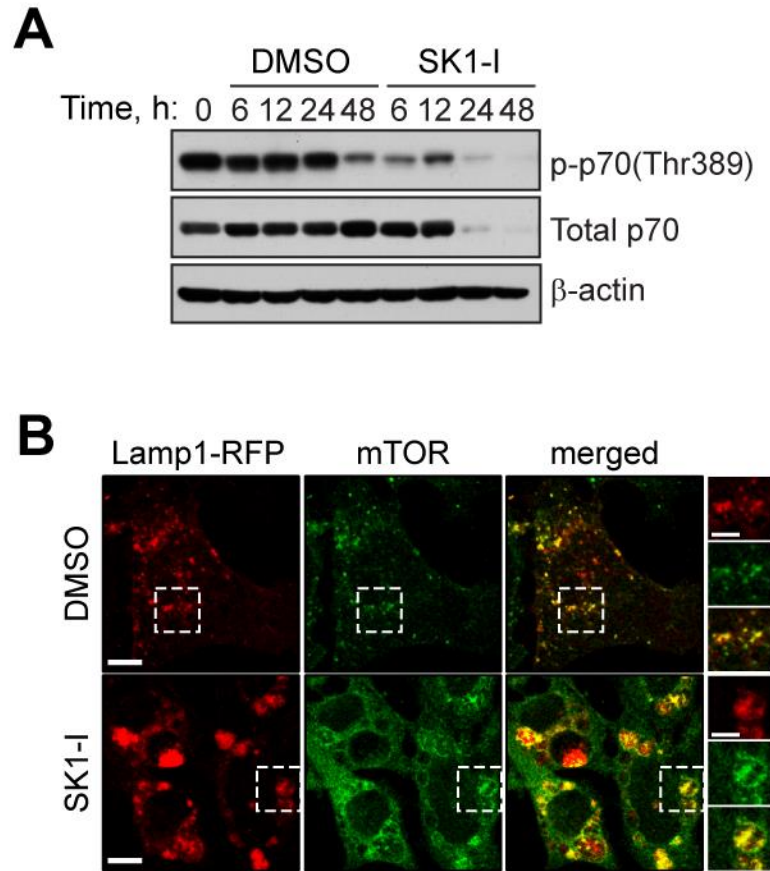

**Figure S6, Related to Figure 5.** (A) Immunoblot of WT MEFs treated with DMSO or 10  $\mu$ M SK1-I for the indicated durations and probed for phospho-p70 S6 kinase (Thr389) [p-p70(Thr389)], total p70 S6 kinase (Total p70) or  $\beta$ -actin. (B) Confocal images of WT MEFs stably expressing Lamp1-RFP and treated with 10  $\mu$ M SK1-I for 4 prior to immunostaining using anti-mTOR. Scale bars represent 20  $\mu$ m.

**Movie S1, Related to Figure 1.** WT MEFs were treated with 7.5  $\mu$ M SK1-I for 1 h prior to live cell time-lapse imaging at one minute intervals for an additional 4 h. Scale bar: 10  $\mu$ m.

**Movie S2, Related to Figure 1.** WT MEFs were treated with 7.5  $\mu$ M SK1-I for 30 minutes prior to live cell time-lapse imaging at 30 minute intervals for an additional 21.5 h. Scale bar: 20  $\mu$ m.

**Movie S3. Related to Figure 1.** *SphK1*<sup>-/-</sup> MEFs were treated with 7.5  $\mu$ M SK1-I for 1 h prior to live cell time-lapse imaging at one minute intervals for an additional 4 h. Scale bar: 10  $\mu$ m.

**Movie S4. Related to Figure 1.** *SphK1*<sup>-/-</sup> MEFs were treated with 7.5  $\mu$ M SK1-I for 30 minutes prior to live cell time-lapse imaging at 30 minute intervals for an additional 21.5 h. Scale bar: 20  $\mu$ m.

**Movie S5. Related to Figure 1.** EGFP-Sphk1 was transiently expressed in *SphK1*<sup>-/-</sup> MEFs and cells were treated with 7.5  $\mu$ M SK1-I for 4 h prior to live cell time-lapse imaging of GFP fluorescence. Scale bar: 10  $\mu$ m.

**Movie S6. Related to Figure 6.** WT MEFs stably expressing Lamp1-RFP were treated with 10  $\mu$ M SK1-I for 24 h prior to live-cell fluorescence time-lapse imaging. Scale bar: 10  $\mu$ m.

## Supplemental Experimental Procedures

**Reagents.** SK1-I was obtained from Enzo Life Sciences (BML-EI411) and dissolved in DMSO (note: aliquotting in glass vials at -20°C is suggested as SK1-I appears to degrade after prolonged storage in plastic tubes). D-erythro-sphingosine (d18:1; Avanti Polar Lipids) was dissolved in chloroform:methanol (90:10) and stored at -20°C. For treatment, solvent was evaporated, and D-erythro-sphingosine was resuspended in DMSO. The following reagents were purchased from the indicated sources: PF-543 (EMD Millipore); N,N-dimethyl-Sphingosine (Tocris Bioscience); FTY720, FTY720-phosphate, fumonisins B1 and E64d (Cayman Chemical). All other chemicals were purchased from Sigma.

**Cell culture.** SV40 large T-antigen immortalized mouse embryonic fibroblasts (MEFs) were kindly provided by: Dr. Noboru Mizushima (*Atg5*<sup>+/+</sup> and *Atg5*<sup>-/-</sup>, Tokyo Medical and Dental University, Tokyo, Japan) and Dr. Shengkan Jin (*Atg3*<sup>+/+</sup> and *Atg3*<sup>-/-</sup>, Robert Wood Johnson Medical School, New Brunswick, NJ). HeLa S3 cells were obtained from ATCC. Cells were cultured in Dulbecco's modified Eagle's medium (DMEM) supplemented with 10% FBS, 100  $\mu$ gml<sup>-1</sup> streptomycin, 100 unitsml<sup>-1</sup> penicillin, and 250 ngml<sup>-1</sup> amphotericin B. As glutamine undergoes spontaneous breakdown to ammonia and both regulate autophagy (Eng et al., 2010), experiments were performed using L-glutamine-free DMEM supplemented with fresh 3 mM L-glutamine immediately prior to experiments. All treatments were performed at 50-60% cell confluency.

**Plasmids.** The following cDNAs were subcloned into the lentiviral transfer vector backbone pCDH1-MCS1-EF1-puro (System Biosciences) using the indicated 5' and 3' restriction sites: Lamp1-RFP (Addgene 1817; 5'-EcoRI, 3'-HpaI/SwaI), DsRed2-Mito (Clontech 632421; 5'-NheI, 3'-NotI), DsRed2-ER (Clontech 632409; 5'-NheI, 3'-BglII/BamHI) and *Atg5*(K130R)-HA (Addgene 22957; 5'-NheI, 3'-NotI).

Murine SphK1a and catalytic mutant SphK1a<sup>G82D</sup> cDNAs were a generous gift from Dr. Sarah Spiegel (Virginia Commonwealth University, Richmond, VA). SphK1a or SphK1a(G82D) cDNA was amplified by PCR (forward primer: 5'-AATACGTCGACGTGAACCAGAATGCCCTC-3', and reverse primer: 5'-CCGCCGATATCTTATGGTTCTTCTGGAGGTG-3') and subcloned into a pLJM1-EGFP vector using 5'-Sall and 3'-EcoRV restriction sites. Plasmids were expressed by nucleofection (Lonza) or lentiviral transduction. Recombinant lentiviruses were produced in HEK293T/17 cells using the third generation lentiviral packaging system (Invitrogen). Stable cell lines were generated by selection with 1  $\mu$ gml<sup>-1</sup> puromycin.

**Antibodies for Immunostaining.** Antibodies used for immunostaining were as follows: anti-Rab7 (Cell Signaling 9367; 1:150); anti-EEA1 (MBL M176-2; 1:1000); anti-Lamp-1 (Santa Cruz sc-19992; 1:100); anti-mTOR (Cell Signaling 2983; 1:150); goat anti-mouse IgG AlexaFluor488 (Invitrogen A11029; 1:2000); goat anti-rabbit IgG

AlexaFluor568 (Invitrogen A11011; 1:2000); goat anti-rat IgG AlexaFluor647 (Invitrogen A21247; 1:2000); goat anti-rabbit IgG AlexaFluor488 (Invitrogen A11008; 1:2000).

**Antibodies of Immunoblotting.** Antibodies used for immunoblotting were as follows: anti-LC3 (Novus Biologicals NB100-2220); anti-p62 (American Research Products 03-GP62-C);  $\beta$ -actin (Sigma A5441); anti-Lamp1 (Santa Cruz sc-19992); anti-Rab7 (Sigma R8779); anti-Rab5 (Cell Signaling 3547); anti-Hsp60 (BD Biosciences 611562); anti-Na<sup>+</sup>/K<sup>+</sup> ATPase (Cell Signaling 3010); anti- $\alpha$ -tubulin (Sigma T5168); anti-TFEB (Bethyl Laboratories A303-673A); anti-PARP (Cell Signaling 9542); anti-phospho-p70 S6 kinase(Thr389) (Cell Signaling 9206); anti-p70 S6 kinase (Cell Signaling 9202). HRP-conjugated secondary antibodies were from GE Healthcare, and IR dye-conjugated secondary antibodies were obtained from LI-COR.

### **Supplemental References**

Eng, C.H., Yu, K., Lucas, J., White, E., and Abraham, R.T. (2010). Ammonia Derived from Glutaminolysis Is a Diffusible Regulator of Autophagy. *Sci. Signal.* 3, ra31–ra31.
